# Supplementary material for: Identifying the genetic causes of developmental disorders and intellectual disability in Africa: a systematic literature review
Source: Front Genet. 2023 May 10;14:1137922. doi: 10.3389/fgene.2023.1137922 (PMC10208355; doi:10.3389/fgene.2023.1137922)
Supplement: Supplementary file 2 [file Table1.xlsx]

## Sheet: Table S1. Articles included
Authors	Year Published	Title	Journal
Abaied, L., et al.	2010	A novel UBE3A truncating mutation in large Tunisian Angelman syndrome pedigree.	American Journal of Medical Genetics Part A 152(1): 141-146.
Abd Elmaksoud, M. S., et al.	2020	Genetic analysis in three Egyptian patients with Griscelli syndrome Type 1 reveals new nonsense mutations in MYO5A.	Clin Exp Dermatol 45(6): 789-792.
Abd Elmaksoud, M., et al.	2020	Vici syndrome in an Egyptian infant: case report and differential diagnosis of inherited hypopigmented disorders.	Egyptian Journal of Medical Human Genetics 21(1): 1-6.
Abdalla, E. M. and Zayed, L. H.	2014	Mowat-Wilson syndrome: deafness in the first Egyptian case who was conceived by intracytoplasmic sperm injection.	Journal of Child Neurology 29(12): NP168-NP170.
Abdalla, E., et al.	2018	Lowe syndrome: a particularly severe phenotype without clinical kidney involvement.	American Journal of Medical Genetics Part A 176(2): 460-464.
Abdel-Aleem, A. and Zaki,M. S.	2008	Spinocerebellar ataxia type 2 (SCA2) in an Egyptian family presenting with polyphagia and marked CAG expansion in infancy.	Journal of neurology 255(3): 413-419.
Abdel-Hamid, M. S., et al.	2016	Co-occurrence of primary microcephaly caused by a novel homozygous Aspm mutation along with X-linked ichthyosis in the same patient.	Genetic Counseling 27(1): 25-25.
Abdel-Hamid, M. S., et al.	2019	Phenotypic and mutational spectrum of thirty-five patients with Sjögren–Larsson syndrome: identification of eleven novel ALDH3A2 mutations and founder effects.	Journal of Human Genetics 64(9): 859-865.
Abdel-Salam, G. M. H., et al.	2007	Phenotypic variability in Micro syndrome: report of new cases.	Genetic Counseling 18(4): 423-423.
Abdel-Salam, G. M. H., et al.	2008	Anorectal anomalies, diaphragmatic defect, cleft palate, lower lip pits, hypopigmentation and hypogammaglobulinemia A in Kabuki syndrome: a rare combination.	Genetic Counseling 19(3): 309-309.
Abdel-Salam, G. M. H., et al.	2016	Megalencephalic leukoencephalopathy with cysts in twelve Egyptian patients: novel mutations in MLC1 and HEPACAM and a founder effect.	Metabolic Brain Disease 31(5): 1171-1179.
Abdel‐Hamid, M. S., et al.	2016	Molecular and phenotypic spectrum of ASPM‐related primary microcephaly: Identification of eight novel mutations.	American Journal of Medical Genetics Part A 170(8): 2133-2140.
Abdel‐Hamid, M. S., et al.	2018	PGAP3‐related hyperphosphatasia with mental retardation syndrome: Report of 10 new patients and a homozygous founder mutation.	Clinical Genetics 93(1): 84-91.
Abdel‐Salam, G. M. H., et al.	2011	Ectodermal abnormalities in patients with Kabuki syndrome.	Pediatric dermatology 28(5): 507-511.
Abdel‐Salam, G. M. H., et al.	2011	Muenke syndrome with pigmentary disorder and probable hemimegalencephaly: An expansion of the phenotype.	American Journal of Medical Genetics Part A 155(1): 207-214.
Abdel‐Salam, G. M. H., et al.	2012	Profound microcephaly, primordial dwarfism with developmental brain malformations: a new syndrome.	American Journal of Medical Genetics Part A 158(8): 1823-1831.
Abdel‐Salam, G. M. H., et al.	2014	Gómez‐López‐hernández syndrome versus rhombencephalosynapsis spectrum: A rare co‐occurrence with bipartite parietal bone.	American Journal of Medical Genetics Part A 164(2): 480-483.
Abdel‐Salam, G. M. H., et al.	2018	Phenotypic and molecular insights into PQBP1‐related intellectual disability.	American Journal of Medical Genetics Part A 176(11): 2446-2450.
Abdel‐Salam, G. M. H., et al.	2019	Biallelic novel missense HHAT variant causes syndromic microcephaly and cerebellar‐vermis hypoplasia.	American Journal of Medical Genetics Part A 179(6): 1053-1057.
Abidi, K., et al.	2015	Williams-Beuren syndrome associated with single kidney and nephrocalcinosis: a case report.	Pan African Medical Journal 22(1).
Achouri, E., et al.	2011	Hereditary sensory and autonomic neuropathy type IV: a report on two cases.	Archives de Pediatrie: Organe Officiel de la Societe Francaise de Pediatrie 18(4): 390-393.
Adeyokunnu, A. A.	1982	The incidence of Down's syndrome in Nigeria.	Journal of Medical Genetics 19(4): 277-279.
Afifi, H. H., et al.	2007	Elejalde syndrome: clinical and histopathological findings in an Egyptian male.	Genetic Counseling 18(2): 179-179.
Afifi, H. H., et al.	2008	Distal 11q monosomy syndrome: a report of two Egyptian sibs with normal parental karyotypes confirmed by molecular cytogenetics.	Genetic Counseling 19(1): 47-47.
Afifi, H. H., et al.	2010	The most encountered groups of genetic disorders in Giza Governorate, Egypt.	Bratisl Lek Listy 111(2): 62-69.
Afifi, H. H., et al.	2019	Lenz–Majewski syndrome in a patient from Egypt.	American Journal of Medical Genetics Part A 179(10): 2039-2042.
Aglan, M. S., et al.	2008	Partial trisomy of the distal part of 10q: a report of two Egyptian cases.	Genetic Counseling 19(2): 199-210.
Aglan, M. S., et al.	2009	Dyggve–Melchior–Clausen syndrome: clinical, genetic, and radiological study of 15 Egyptian patients from nine unrelated families.	Journal of children's orthopaedics 3(6): 451-458.
Aloui, M., et al.	2017	Fetopathological examination for the fetuses with Down syndrome in Tunisia: epidemiological study and associated malformations.	Pathology-Research and Practice 213(9): 1200-1206.
Amasdl, S., et al.	2016	Insulin-like growth factor type 1 deficiency in a Moroccan patient with de novo inverted duplication 9p24p12 and developmental delay: a case report.	Journal of Medical Case Reports 10(1): 1-5.
Amasdl, S., et al.	2016	Insulin-like growth factor type 1 deficiency in a Moroccan patient with de novo inverted duplication 9p24p12 and developmental delay: a case report.	Journal of Medical Case Reports 10(1): 1-5.
Amasdl, S., et al.	2017	Familial X/Y Translocation Encompassing ARSE in Two Moroccan Siblings with Sensorineural Deafness.	Cytogenetic and Genome Research 153(2): 66-72.
Amr, K. S., et al.	2020	Assessment of Multiplex Ligation-Dependent Probe Amplification (MLPA) as a diagnostic test for Egyptian patients with Williams-Beuren syndrome.	Gene Reports 20: 100767-100767.
Amr, K., et al.	2019	Genetic assessment of ten Egyptian patients with Sjögren–Larsson syndrome: expanding the clinical spectrum and reporting a novel ALDH3A2 mutation.	Archives of Dermatological Research 311(9): 721-730.
Anderson, I.F., Goeller, E. A. and Wallace, C.	1964	Sex chromosome abnormalities in a population of 1,662 mental defectives.	South African Medical Journal 38(17): 346-349.
Assogba, K., et al.	2009	Place de l’épilepsie chez les enfants et les adolescents souffrant de retard mental dans les centres «Envol» de Lomé, Togo.	Epilepsies 21(1): 86-92.
Badejo, O. A., et al.	2018	Delleman–Oorthuys syndrome (oculocerebrocutaneous syndrome) in a Nigerian child: a case report.	Therapeutic Advances in Ophthalmology 10: 2515841418817486-2515841418817486.
Barro, M., et al.	2015	Diagnostic path of a genetic disease: a case of Williams-Beuren syndrome in Burkina Faso.	Pediatric Reports 7(4): 5817-5817.
Bastaki, F., et al.	2016	Novel splice‐site mutation in WDR 62 revealed by whole‐exome sequencing in a S udanese family with primary microcephaly.	Congenital Anomalies 56(3): 135-137.
Bayou, F., et al.	2011	Adams-Oliver syndrome.	Annales de Dermatologie et de Venereologie.
Belkady, B., et al.	2018	Chromosomal abnormalities in patients with intellectual disability: a 21-year retrospective study.	Human Heredity 83(5): 274-282.
Belmokhtar, F., et al.	2016	Cytogenetic study of down syndrome in Algeria: Report and review.	Journal of Medical Sciences 36(2): 46-46.
Ben Abdelaziz, R., et al.	2018	Pancytopenia Revealing Phenylketonuria: Coincidence or First Case Report.	Iranian Journal of Blood and Cancer 10(1): 25-27.
Ben-Abdallah-Bouhjar, I., et al.	2012	Chromosomal microarray analysis of functional Xq27-qter disomy and deletion 3p26. 3 in a boy with Prader–Willi like features and hypotonia.	European Journal of Medical Genetics 55(8-9): 461-465.
Ben-Khemis, L., et al.	2017	A founder mutation underlies a severe form of phosphoglutamase 3 (PGM3) deficiency in Tunisian patients.	Molecular Immunology 90: 57-63.
Benhaourech, S., et al.	2016	Congenital heart disease and Down syndrome: various aspects of a confirmed association.	Cardiovascular journal of Africa 27(5): 287-290.
Bernstein, R., et al.	1978	Translocation of chromosome 4 and 9 with ring formation of chromosome 4 short arm.	Journal of Medical Genetics 15(4): 310-314.
Bernstein, R., et al.	1979	X; 15 translocation in a retarded girl: X inactivation pattern and attempt to localise the hexosaminidase A and other loci.	Journal of Medical Genetics 16(4): 254-262.
Bernstein, R., et al.	1985	Segregation patterns and phenotypes of unbalanced offspring in a large family with (10; 18) chromosome translocation.	American Journal of Medical Genetics 22(4): 727-742.
Bezuidenhout, H., et al.	2020	Hyperphosphatasia with mental retardation syndrome type 4 in three unrelated South African patients.	American Journal of Medical Genetics Part A 182(10): 2230-2235.
Bouattour, N., et al.	2020	Neurological manifestations of Sanjad–Sakati syndrome: new three reported cases from Tunisia.	Journal of Pediatric Neurology 18(02): 126-130.
Bougacha-Elleuch, N., et al.	2015	Segregation of S292F TPO gene mutation in three large Tunisian families with thyroid dyshormonogenesis: evidence of a founder effect.	European journal of pediatrics 174(11): 1491-1501.
Boughamoura, L., et al.	2006	Le syndrome de Gillespie: à propos de 2 cas familiaux Gillespie syndrome: 2 familial cases.	Archives de Pédiatrie 13: 1323-1325.
Boughamoura, L., et al.	2007	La maladie de Canavan ou acidurie N-acétyl aspartique: à propos de 1 cas Canavan disease or N-acetyl aspartic aciduria: a case report.	Archives de Pédiatrie 14: 173-176.
Bouhjar, I. B. A., et al.	2012	Cryptic Rearrangements in Idiopathic Intellectual Disability Diagnosed by Molecular Cytogenetic Analysis.	International Journal of Human Genetics 12(3): 157-171.
Bowcock, A. M., et al.	1984	The haemoglobin H disease mental retardation syndrome: molecular studies on the South African case.	British journal of haematology 56(1): 69-78.
Boycott, K. M., et al.	2015	Autosomal-recessive intellectual disability with cerebellar atrophy syndrome caused by mutation of the manganese and zinc transporter gene SLC39A8.	The American Journal of Human Genetics 97(6): 886-893.
Brooks, A. S., et al.	1999	A consanguineous family with Hirschsprung disease, microcephaly, and mental retardation (Goldberg-Shprintzen syndrome).	Journal of Medical Genetics 36(6): 485-489.
Brusnický, J., et al.	1986	Severe mental retardation in six generations of a large South African family carrying a translocation t (6; 10)(q27; q25. 2).	Journal of Medical Genetics 23(5): 435-445.
Cauley, E. S., et al.	2019	Overlap of polymicrogyria, hydrocephalus, and Joubert syndrome in a family with novel truncating mutations in ADGRG1/GPR56 and KIAA0556.	Neurogenetics 20(2): 91-98.
Chaabouni, M., et al.	2007	De novo trisomy 20p of paternal origin.	American Journal of Medical Genetics Part A 143(10): 1100-1103.
Chabaâ, L., et al.	2006	Oculo-cerebro-renal Lowe syndrome: clinical, biochemical and molecular studies in a Moroccan patient.	Annales de biologie clinique 64(1):53-9
Chafai-Elalaoui, S., et al.	2015	A homozygous AHI1 gene mutation (p. Thr304AsnfsX6) in a consanguineous Moroccan family with Joubert syndrome: a case report.	Journal of Medical Case Reports 9(1): 1-5.
Charles, A. L.	2009	Fragile X allelemorphism among the mentally retarded and in affected families.	Scientific Research and Essays 4(10): 1123-1131.
Chentli, F. and Zellagui, H.	2014	Baraitser and Winter syndrome with growth hormone deficiency.	Journal of Pediatric Neurosciences 9(3): 257-257.
Cherkaoui Jaouad, I., et al.	2018	A novel non sense mutation in WDR62 causes autosomal recessive primary microcephaly: a case report.	BMC Medical Genetics 19(1): 1-5.
Chikhaoui, A., et al.	2019	Identification of a ERCC5 c. 2333T> C (L778P) variant in two Tunisian siblings with mild xeroderma pigmentosum phenotype.	Frontiers in genetics 10: 111-111.
Chograni, M., et al.	2011	The first missense mutation of NHS gene in a Tunisian family with clinical features of NHS syndrome including cardiac anomaly.	European Journal of Human Genetics 19(8): 851-856.
Christianson, A. L., et al.	1999	X linked severe mental retardation, craniofacial dysmorphology, epilepsy, ophthalmoplegia, and cerebellar atrophy in a large South African kindred is localised to Xq24-q27.	Journal of Medical Genetics 36(10): 759-766.
Courtens, W., et al.	1997	Acrocallosal syndrome in Algerian boy born to consanguineous parents: Review of the literature and further delineation of the syndrome.	American Journal of Medical Genetics 69(1): 17-22.
Daoudi, S., et al.	2014	De Vivo disease. GLUT-1 deficiency syndrome: a case report.	Archives de Pediatrie: Organe Officiel de la Societe Francaise de Pediatrie 21(3): 302-305.
de Jong, G., et al.	1998	RSH (Smith‐Lemli‐Opitz) syndrome:“Severe” phenotype with ectrodactyly.	American Journal of Medical Genetics 75(3): 283-287.
de Saxe, M., Kromberg, J.G., and Jenkins, T.	1984	Waardenburg syndrome in South Africa-Part I. An evaluation of the clinical findings in 11 families.	South African Medical Journal 66(7): 256-261.
Dekker, M. C. J., et al.	2019	Ellis‐van creveld syndrome in a patient from Tanzania.	American Journal of Medical Genetics Part A 179(10): 2034-2038.
Deleu, D., et al.	1997	Familial progressive sensorimotor neuropathy with agenesis of the corpus callosum (Andermann syndrome): a clinical, neuroradiological and histopathological study.	European neurology 37(2): 104-109.
Delport, S. D., et al.	1995	Congenital anomalies in black South African liveborn neonates at an urban academic hospital.	South African Medical Journal 85(1): 11-15.
Desprairies, C., et al.	2020	Three novel patients with epileptic encephalopathy due to biallelic mutations in the PLCB1 gene.	Clinical Genetics 97(3): 477-482.
Donaldson, S. J. F., et al.	1999	Trisomy 18 with total cranio‐rachischisis and thoraco‐abdominoschisis.	Prenatal Diagnosis 19(6): 580-582.
Du Plessis, J. A., et al.	2001	An atypical carbohydrate deficient glycoprotein (CDG) syndrome patient in South Africa.	South African Medical Journal 91(5): 392-394.
Eid, M. M., et al.	2013	Ring chromosome 15: expanding the phenotype.	Genetic Counseling 24(4): 417-417.
Eid, M. M., et al.	2020	Clinical and cytogenetic assessment of a cohort of Egyptian patients with Neurofibromatosis 1.	Gene Reports 18: 100573-100573.
Eid, M., et al.	2020	Further Insights into Developmental Brain Malformations and Leukoencephalopathy Associated with 6p25. 3 Deletion.	Neuropediatrics 51(01): 76-82.
Ekanem, T. B., et al.	2008	Prevalence of congenital malformations in Cross River and Akwa Ibom states of Nigeria from 1980–2003.	Congenital Anomalies 48(4): 167-170.
El Kettani, N. E.-C. and Dafiri, R.	2004	Syndrome cérébrocostomandibulaire. À propos d’un cas.	Archives de Pédiatrie 11(2): 115-117.
El-Bassyouni, H. T., et al.	2014	Terminal 2q deletion and partial trisomy chromosome 15q: A clinical and cytogenetic study.	Genetic Counseling 25(2): 151-151.
El-Bassyouni, H. T., et al.	2014	Holoprosencephaly spectrum among Egyptian patients: clinical and cytogenetic study.	Genetic Counseling 25(4): 369-381.
El-Dessouky, S. H., et al.	2020	Prenatal presentation of Walker–Warburg syndrome with a POMT2 mutation: an extended fetal phenotype.	Egyptian Journal of Medical Human Genetics 21(1): 1-6.
El‐Dessouky, S. H., et al.	2020	Prenatal ultrasound findings of holoprosencephaly spectrum: unusual associations.	Prenatal Diagnosis 40(5): 565-576.
El‐Dessouky, S. H., et al.	2020	Prenatal delineation of a distinct lethal fetal syndrome caused by a homozygous truncating KIDINS220 variant.	American Journal of Medical Genetics Part A 182(12): 2867-2876.
El‐Ruby, M., et al.	2018	Identification of a novel homozygous ALX4 mutation in two unrelated patients with frontonasal dysplasia type‐2.	American Journal of Medical Genetics Part A 176(5): 1190-1194.
Elalaoui, S. C., et al.	2011	A recurrent mutation in Moroccan patients with Dyggve-Melchior-Clausen syndrome: Report of a new case and review.	Indian Journal of Human Genetics 17(2): 97-97.
Elghezal, H., et al.	2004	Large duplication 4q25–q34 with mild clinical effect.	Annales de Genetique 47(4):419-22
Elghezal, H., et al.	2007	Ring chromosome 20 syndrome without deletions of the subtelomeric and CHRNA4–KCNQ2 genes loci.	European Journal of Medical Genetics 50(6): 441-445.
Ellaithi, M., et al.	2007	A case of Cornelia de Lange syndrome from Sudan.	BMC pediatrics 7(1): 1-5.
Elsayed, S. M., et al.	2014	Autosomal dominant SCA5 and autosomal recessive infantile SCA are allelic conditions resulting from SPTBN2 mutations.	European Journal of Human Genetics 22(2): 286-288.
Essop, F. B. and Krause, A.	2013	Diagnostic, carrier and prenatal genetic testing for fragile X syndrome and other FMR-1-related disorders in Johannesburg, South Africa: a 20-year review: Festschrift: Professor Trefor Jenkins-molecular genetics.	South African Medical Journal 103(12): 994-998.
Feben, C., et al.	2014	Phenotypic consequences in black South African Fanconi anemia patients homozygous for a founder mutation.	Genetics in Medicine 16(5): 400-406.
Felhi, R., et al.	2020	Mutations in aARS genes revealed by targeted next-generation sequencing in patients with mitochondrial diseases.	Molecular Biology Reports 47(5): 3779-3787.
Fieggen, K., et al.	2016	Bardet Biedl syndrome in South Africa: a single founder mutation: the new millennium.	South African Medical Journal 106(sup-1): 72-74.
Forci, K., et al.	2020	Prevalence of congenital malformations at the “les Orangers” maternity and reproductive health Hospital of Rabat: descriptive study of 470 anomalies.	BMC pediatrics 20(1): 1-10.
Friedman, J., et al.	2019	Biallelic mutations in valyl-tRNA synthetase gene VARS are associated with a progressive neurodevelopmental epileptic encephalopathy.	Nature communications 10(1): 1-10.
García, A. G.-C., et al.	2020	Phenotype and variations associated with the deletion of the 1q44 cytoband and the pathogenic duplication in the 9q32q34. 3 cytobands.	BMJ Case Reports 13(3): e231938-e231938.
Gerards, M., et al.	2010	Defective complex I assembly due to C20orf7 mutations as a new cause of Leigh syndrome.	Journal of Medical Genetics 47(8): 507-512.
Gericke, G. S. and Fialkov, J.	1980	The Langer-Giedion phenotype associated with a unique skeletal finding in a mentally retarded adolescent male-a case report.	South African Medical Journal 57(14): 548-550.
Ghorbel, R., et al.	2018	First report of an unusual novel double mutation affecting the transcription repression domain of MeCP2 and causing a severe phenotype of Rett syndrome: Molecular analyses and computational investigation.	Biochemical and biophysical research communications 497(1): 93-101.
Ghosh, S. G., et al.	2020	Recurrent homozygous damaging mutation in TMX2, encoding a protein disulfide isomerase, in four families with microlissencephaly.	Journal of Medical Genetics 57(4): 274-282.
Glanzmann, B., et al.	2018	Variable expression in SAMHD1-associated familial Aicardi-Goutières Syndrome.	Current Allergy & Clinical Immunology 31(4): 265-270.
Grace, H.J., Ally, F.E., Nelemans, A.P., Kint B. A	1979	A cytogenetic study of a mentally retarded population in South Africa.	South African Medical Journal 55(18): 707-709.
Hadj Amor, M., et al.	2020	Neuronal migration genes and a familial translocation t (3; 17): candidate genes implicated in the phenotype.	BMC Medical Genetics 21(1): 1-11.
Hafez, M., et al.	1984	Demographic trends of Down's syndrome in Egypt.	Human biology 56(4):703-12.
Hafez, M., et al.	2017	Sanjad Sakati syndrome: case reports from Egypt.	Egyptian Pediatric Association Gazette 65(1): 6-9.
Haverkamp, F., et al.	1995	Familial schizencephaly: further delineation of a rare disorder.	Journal of Medical Genetics 32(3): 242-244.
Henderson, H.E., Goodman, R., Schram, J., Diamond, E., and Daneel, A..	1981	Biochemical screening for inherited metabolic disorders in the mentally retarded.	South African Medical Journal 60(19): 731-733.
Hila, L., et al.	2010	Subtelomeric Microduplications in Three Sisters with Moderate Mental Retardation.	Biochemical genetics 48(11): 909-914.
Hof, J. O. t., et al.	1985	A multidisciplinary diagnostic/genetic study on the 105 patients with mental retardation of the ES Le Grange School.	Journal of Intellectual Disability Research 29(1): 37-47.
Hofmeister, B., et al.	2020	Cooccurrence of Two Different Genetic Diseases: A Case of Valproic Acid Hepatotoxicity in Nicolaides–Baraitser Syndrome (SMARCA2 Mutation)—Due to a POLG1-Related Effect?	Neuropediatrics 51(01): 49-52.
Husain, R. A., et al.	2020	Bi-allelic HPDL variants cause a neurodegenerative disease ranging from neonatal encephalopathy to adolescent-onset spastic paraplegia.	The American Journal of Human Genetics 107(2): 364-373.
Ijaduola, T. G. A. and Ademiluyi,S. A.	1986	Otorhinolaryngological manifestations of von Recklinghausen's disease in Nigerians.	The Journal of Laryngology & Otology 100(1): 115-124.
Ismail, S., et al.	2014	Novel mutation in the fukutin gene in an Egyptian family with Fukuyama congenital muscular dystrophy and microcephaly.	Gene 539(2): 279-282.
Ismail, S., et al.	2016	Roberts syndrome: clinical and cytogenetic studies in 8 Egyptian patients and molecular studies in 4 patients with genotype/phenotype correlation.	Genetic Counseling 27(3): 305-323.
Izuora G, I.	1985	Aetiology of mental retardation in Nigerian children around Enugu.	Central African Journal of Medicine 31(1): 13-16.
Jaouad, I. C., et al.	2010	Cytogenetic and epidemiological profiles of Down syndrome in a Moroccan population: a report of 852 cases.	Singapore medical journal 51(2): 133-133.
Jaouadi, H., et al.	2019	A severe clinical phenotype of Noonan syndrome with neonatal hypertrophic cardiomyopathy in the second case worldwide with RAF1 S259Y neomutation.	Genetics Research 101.
Jdila, M. B., et al.	2020	Unusual double mutation in MECP2 and CDKL5 genes in Rett-like syndrome: correlation with phenotype and genes expression.	Clinica Chimica Acta 508: 287-294.
Johnson, A. W. and Mokuolu, O. A.	2001	Russell-Silver Syndrome in a Nigerian infant with intrauterine growth retardation.	Journal of the National Medical Association 93(5): 185-185.
Kana, M. A., et al.	2018	A 37-year-old Nigerian woman with Apert syndrome–medical and psychosocial perspectives: a case report.	Journal of Medical Case Reports 12(1): 1-5.
Kengne Kamga, K., et al.	2020	Cascade testing for fragile X syndrome in a rural setting in Cameroon (sub-Saharan Africa).	Genes 11(2): 136-136.
Kerkeni, E., et al.	2015	Sanjad-Sakati syndrome in a Tunisian child.	Archives de Pédiatrie 22(9): 951-955.
Kharrat, M., et al.	2017	Clinical, molecular, and computational analysis in patients with a novel double mutation and a new synonymous variant in MeCP2: report of the first missense mutation within the AT-hook1 cluster in Rett syndrome.	Journal of Child Neurology 32(8): 694-703.
Kharrat, M., et al.	2019	First description of an unusual novel double mutation in MECP2 co-occurring with the m. 827A> G mutation in the MT-RNR1 gene associated with angelman-like syndrome.	International Journal of Developmental Neuroscience 79: 37-44.
Khedhiri, S., et al.	2011	Morquio A disease: clinical and molecular study of Tunisian patients.	Annales de Biologie Clinique.
Khelifa, H. B., et al.	2013	Xp22. 3 interstitial deletion: a recognizable chromosomal abnormality encompassing VCX3A and STS genes in a patient with X-linked ichthyosis and mental retardation.	Gene 527(2): 578-583.
Khemir, S., et al.	2011	Phenylketonuria is still a major cause of mental retardation in Tunisia despite the possibility of treatment.	Clinical neurology and neurosurgery 113(9): 727-730.
Khemir, S., et al.	2012	Screening of three Mediterranean phenylketonuria mutations in Tunisian families.	Journal of genetics 91(1): 91-91.
Kishk, N. A., et al.	2017	Case report: Homozygous PRRT2 mutation in ICCA Egyptian family with reduced penetrance.	Meta Gene 11: 104-107.
Kitenge, T. K., et al.	2016	Microtia in Cornelia de Lange syndrome: a case from Democratic Republic of the Congo.	Clinical Dysmorphology 25(4): 178-180.
Kouassi, F. X., et al.	2006	Congenital anophthalmias: a case of trisomy 13.	Journal Francais D'ophtalmologie 29(4): e10-e10.
Kraoua, I., et al.	2010	Joubert syndrome and related disorders: Report of five Tunisian cases.	Journal of Pediatric Neurology 8(2): 199-204.
Kraoua, L., et al.	2011	Hexasomy of the Prader–Willi/Angelman critical region, including the OCA2 gene, in a patient with pigmentary dysplasia: Case report.	European Journal of Medical Genetics 54(4): e446-e450.
Kraoua, L., et al.	2012	Pseudoaminopterin syndrome.	American Journal of Medical Genetics Part A 158(9): 2233-2238.
Kruszka, P. et al.	2020	Turner syndrome in diverse populations.	American Journal of Medical Genetics Part A 82(2):303-313
Lagunju, I. A., et al.	2007	Severe Neurological Involvement In Tuberous Sclerosis: A Report Of Two Cases And A Review Of The African Literature	African Journal of Neurological Sciences 26(2): 102-108.
Lahbib, S., et al.	2019	Novel MED12 variant in a multiplex Fragile X syndrome family: dual molecular etiology of two X-linked intellectual disabilities with autism in the same family.	Molecular Biology Reports 46(4): 4185-4193.
Landouré, G., et al.	2019	Hereditary spastic paraplegia type 35 in a family from Mali.	American Journal of Medical Genetics Part A 179(7): 1122-1125.
Larnaout, A., et al.	1998	Juvenile form of dihydropteridine reductase deficiency in 2 Tunisian patients.	Neuropediatrics 29(06): 322-323.
Lee, S., et al.	2019	Bi-allelic loss of human APC2, encoding adenomatous polyposis coli protein 2, leads to lissencephaly, subcortical heterotopia, and global developmental delay.	The American Journal of Human Genetics 105(4): 844-853.
Lotz, B. P. and van der Meyden C.H.	1985	Myotonic dystrophy-Part II. A clinical study of 96 patients.	South African Medical Journal 67(20): 815-817.
Louhichi, N., et al.	2019	Thyroid involvement in Chanarin-Dorfman syndrome in adults in the largest series of patients carrying the same founder mutation in ABHD5 gene.	Orphanet journal of rare diseases 14(1): 1-8.
Lumaka, A., et al.	2016	Williams–Beuren syndrome: pitfalls for diagnosis in limited resources setting.	Clinical Case Reports 4(3): 294-297.
Lumaka, A., et al.	2018	A comprehensive clinical and genetic study in 127 patients with ID in Kinshasa, DR Congo.	American Journal of Medical Genetics Part A 176(9): 1897-1909.
Luquetti, D. V., et al.	2007	Gillespie syndrome: additional findings and parental consanguinity.	Ophthalmic Genetics 28(2): 89-93.
M’hamdi, O., et al.	2011	Prevalence of Bardet–Biedl syndrome in Tunisia.	Journal of community genetics 2(2): 97-99.
Maaloul, I., et al.	2013	Megalencephaly with dystonia revealing Canavan disease.	Archives de Pediatrie: Organe Officiel de la Societe Francaise de Pediatrie 20(7): 783-786.
Mahmoud, I. G., et al.	2014	Clinical, neuroimaging, and genetic characteristics of megalencephalic leukoencephalopathy with subcortical cysts in Egyptian patients.	Pediatric Neurology 50(2): 140-148.
Mahmoud, I. G., et al.	2020	ASAH1‐related disorders: Description of 15 novel pediatric patients and expansion of the clinical phenotype.	Clinical Genetics 98(6): 598-605.
Makrythanasis, P., et al.	2016	Pathogenic variants in PIGG cause intellectual disability with seizures and hypotonia.	The American Journal of Human Genetics 98(4): 615-626.
Manasse, B. F., et al.	2000	The Pallister-Killian syndrome is reliably diagnosed by FISH on buccal mucosa.	Clinical Dysmorphology 9(3): 163-165.
Mansour, L., et al.	2015	Genotype–phenotype relationship among Egyptian children with Rett syndrome.	The Journal Of The Egyptian Public Health Association 90(3): 133-137.
Martins, C., et al.	2019	Molecular characterization of a large group of Mucopolysaccharidosis type IIIC patients reveals the evolutionary history of the disease.	Human mutation 40(8): 1084-1100.
Mbuyi-Musanzayi, S., et al.	2017	Wolf-Hirschhorn syndrome: clinical and genetic data from a first case diagnosed in Central Africa.	Journal of pediatric genetics 6(03): 186-190.
Megdiche-Bazarbacha, H., et al.	2005	Le syndrome de Dyggve-Melchior-Clausen: à propos d'une observation.	Journal de Pédiatrie et de Puériculture 18(2): 59-61.
Mohamed, A. M., et al.	2018	Cytogenomic characterization of 1q43q44 deletion associated with 4q32. 1q35. 2 duplication and phenotype correlation.	Molecular Cytogenetics 11(1): 1-10.
Mohamed, A. M., et al.	2020	Two abnormal cell lines of trisomy 14 and t (X; 14) with skewed X-inactivation.	Cytogenetic and Genome Research 160(3): 124-133.
Mohammed, E. E. A. and Fateen, E. M.	2019	Identification of three novel Homozygous NAGLU mutations in Egyptian patients with Sanfilippo Syndrome B.	Meta Gene 21: 100580-100580.
Mohammed, S. D. E., et al.	2020	Klippel–Feil Syndrome: A Rare Case Report.	Donald School Journal of Ultrasound in Obstetrics and Gynecology 14(1): 14-16.
Molebatsi, K. and Olashore, A. A.	2018	Early-onset psychosis in an adolescent with DiGeorge syndrome: A case report.	South African Journal of Psychiatry 24(1): 1-3.
Mosaeilhy, A., et al.	2017	Genotype-phenotype correlation in 18 Egyptian patients with glutaric acidemia type I.	Metabolic Brain Disease 32(5): 1417-1426.
Mourali, M., et al.	2010	First trimester diagnosis of Pallister-Killian syndrome in a fetus with suggestive abnormalities.	La Tunisie Medicale 88(9): 666-669.
Mubungu, G., et al.	2020	Phenotype and growth in Sotos syndrome patient from DR Congo (Central Africa).	American Journal of Medical Genetics Part A 182(7): 1572-1575.
Mudau, M. M., et al.	2017	A novel FKRP-related muscular dystrophy founder mutation in South African Afrikaner patients with a phenotype suggestive of a dystrophinopathy.	South African Medical Journal 107(1): 80-82.
Mutesa, L., et al.	2007	Molecular analysis in two siblings African patients with severe form of Hunter Syndrome: identification of a novel (p. Y54X) nonsense mutation.	Journal of Tropical Pediatrics 53(6): 434-437.
Mutesa, L., et al.	2008	Spinocerebellar ataxia type 2 (SCA2): clinical features and genetic analysis.	Journal of Tropical Pediatrics 54(5): 350-352.
Natiq, A., et al.	2014	A new case of de novo 19p13. 2p13. 12 deletion in a girl with overgrowth and severe developmental delay.	Molecular Cytogenetics 7(1): 1-7.
Nazmy, N., et al.	2019	Familial reciprocal non robertsonian translocation t (14; 22) resulting in 22q11. 2 deletion syndrome.	The Turkish Journal of Pediatrics 61(5): 780-785.
Nelson, M.M., and Smart, R.D.	1982	The results of chromosome examinations in an institution for mental retardates in the Cape Province.	South African Medical Journal 62(1): 25-29.
Neuray, C., et al.	2020	Early-infantile onset epilepsy and developmental delay caused by bi-allelic GAD1 variants.	Brain 143(8): 2388-2397.
Nouioua, S., et al.	2013	Creatine deficiency syndrome. A treatable myopathy due to arginine–glycine amidinotransferase (AGAT) deficiency.	Neuromuscular Disorders 23(8): 670-674.
Okoroma, E. O. and Izuora G. I.	1987	Rubinstein-Taybi syndrome: report of a case in a Nigerian child.	Journal of the National Medical Association 79(11): 1198-1198.
Olubunmi, O. A.	2010	Misdiagnosis of tuberous sclerosis in a Nigeria girl: A case report and review of literature.	Annals of African medicine 9(2).
Omalu, B. I. and Nnebe-Agunadu,U. H.	2009	Occurence of anaplastic oligodendroglioma in a patient with williams syndrome: a case report with analysis of mutational profile of tumor.	Nigerian Journal of Clinical Practice 12(2).
Omar, H. A. H., et al.	2016	Molecular characterization of X chromosome fragility in idiopathic mental retardation.	Egyptian Journal of Medical Human Genetics 17(2): 165-172.
Op't Hof, J., et al.	1991	Down's syndrome in South Africa-incidence, maternal age and utilisation of prenatal diagnosis.	South African Medical Journal 79(2): 213-216.
Ouattara, A. B. I., et al.	2020	The Seckel syndrome: A case observed in the pediatric department of the University Hospital Center Sourou Sanou (Burkina Faso).	Pediatric Reports 12(1): 8231-8231.
Ouesleti, S., et al.	2011	Molecular characterization of MPS IIIA, MPS IIIB and MPS IIIC in Tunisian patients.	Clinica Chimica Acta 412(23-24): 2326-2331.
Ouldim, K., et al.	2012	Microdeletion syndromes (Williams syndrome and deletion syndrome 22q11) at CHU Hassan II of Fez: report of 3 observations.	The Pan African Medical Journal 11: 3-3.
Ouldim, K., et al.	2012	Case Report-Le syndrome de Cri du Chat: A propos d’une observation.	Pan African Medical Journal 11(1).
Outtaleb, F. Z., et al.	2020	13q interstitial deletion in a moroccan child with hereditary retinoblastoma and intellectual disability: A case report.	Annals of Medicine and Surgery 60: 334-337.
Petersen, E. M.	1986	Sanfilippo's syndrome type C-the first known case in South Africa.	South African Medical Journal 69(1): 63-68.
Pillay, T., et al.	1998	Pigmentary abnormalities in trisomy of chromosome 13.	Clinical Dysmorphology 7(3): 191-194.
Piloya, T., et al.	2020	Fanconi–Bickel syndrome in a Ugandan child–diagnostic challenges in resource-limited settings: a case report.	Journal of Medical Case Reports 14(1): 1-5.
Pisaneschi, E., et al.	2015	CHARGE syndrome due to deletion of region upstream of CHD7 gene START codon.	BMC Medical Genetics 16(1): 1-5.
Rafai, M. A., et al.	2008	Sjögren-Larsson syndrome: a novel mutation in a Moroccan child.	Archives de Pediatrie: Organe Officiel de la Societe Francaise de Pediatrie 15(11): 1648-1651.
Rao, V., et al.	2013	Chitayat–Hall syndrome: extending the clinical phenotype.	Clinical Dysmorphology 22(4): 156-160.
Ratbi, I., et al.	2007	Mowat-Wilson syndrome in a Moroccan consanguineous family.	Indian Journal of Human Genetics 13(3): 122-122.
Ratbi, I., et al.	2013	Report of the first clinical case of a Moroccan Kabuki patient with a novel MLL2 mutation.	Molecular Syndromology 4(3): 152-156.
Ratbi, I., et al.	2015	The Bedouin mutation c. 155-166del of the TBCE gene in a patient with Sanjad-Sakati syndrome of Moroccan origin.	Annals of Saudi Medicine 35(2): 170-172.
Rejeb, I., et al.	2008	A novel splice mutation in PAK3 gene underlying mental retardation with neuropsychiatric features.	European Journal of Human Genetics 16(11): 1358-1363.
Rejeb, I., et al.	2011	A novel frame shift mutation in the PQBP1 gene identified in a Tunisian family with X-linked mental retardation.	European Journal of Medical Genetics 54(3): 241-246.
Rejeb, I., et al.	2017	First case report of Cohen syndrome in the Tunisian population caused by VPS13B mutations.	BMC Medical Genetics 18(1): 1-5.
Retief, A.E. et al.	1979	n Analise van sitogenetiese studies op 2334 pasiente.	South African Medical Journal 55(26): 1076-1081.
Robreau-Fraolini, A. M., et al.	2000	Porphobilinogen deaminase gene in African and Afro-Caribbean ethnic groups: mutations causing acute intermittent porphyria and specific intragenic polymorphisms.	Human genetics 107(2): 150-159.
Rosti, R. O., et al.	2016	Extending the mutation spectrum for Galloway–Mowat syndrome to include homozygous missense mutations in the WDR73 gene.	American Journal of Medical Genetics Part A 170(4): 992-998.
Saadeh, R., et al.	2007	Albinism and developmental delay: the need to test for 15q11-q13 deletion.	Pediatric Neurology 37(4): 299-302.
Saadi, A., et al.	2009	Compound heterozygous ASPM mutations associated with microcephaly and simplified cortical gyration in a consanguineous Algerian family.	European Journal of Medical Genetics 52(4): 180-184.
Saadi, A., et al.	2016	Refining the phenotype associated with CASC5 mutation.	Neurogenetics 17(1): 71-78.
Sadek, A. A., et al.	2013	Clinicolaboratory profile of phenylketonuria (PKU) in sohag university hospital-upper Egypt.	Egyptian Journal of Medical Human Genetics 14(3): 293-298.
Sadek, A. A., et al.	2015	Multidisciplinary approach for evaluation of neurocutaneous disorders in children in Sohag University Hospital, Upper Egypt.	Egyptian Journal of Medical Human Genetics 16(2): 149-157.
Sadek, A. A., et al.	2018	Clinical and neuropsychological outcomes for children with phenylketonuria in Upper Egypt; a single-center study over 5 years.	Neuropsychiatric disease and treatment 14: 2551-2551.
Salam, E. A., et al.	2014	Evaluation of neural damage in Duchenne muscular dystrophy patients.	Acta Myologica 33(1): 13-13.
Saleem, T. H., et al.	2017	Clinical and genetic assessment of pediatric patients with Gaucher’s disease in Upper Egypt.	Egyptian Journal of Medical Human Genetics 18(3): 249-255.
Samir, H., et al.	2011	Seizures and intellectual outcome: clinico-radiological study of 30 Egyptian cases of tuberous sclerosis complex.	European Journal of Paediatric Neurology 15(2): 131-137.
Samri, I., et al.	2013	Chromosome markers: case report.	The Pan African Medical Journal 15: 104-104.
Satekge, T. M., et al.	2019	Mevalonate kinase deficiency masked by cytomegalovirus infection and obscure liver disease.	Clinica Chimica Acta 498: 122-125.
Sayed, I. S. M., et al.	2020	KBG syndrome in two patients from Egypt.	American Journal of Medical Genetics Part A 182(6): 1309-1312.
Scala, M., et al.	2020	RSRC1 loss-of-function variants cause mild to moderate autosomal recessive intellectual disability.	Brain 143(4): e31-e31.
Schmidt, R., et al.	1970	A clinical entity simulating familial dysautonomia in a North African Jewish family.	The Journal of Pediatrics 76(2): 283-288.
Selim, L. A., et al.	2014	Selective screening for inborn errors of metabolism by tandem mass spectrometry in Egyptian children: a 5 year report.	Clinical biochemistry 47(9): 823-828.
Settin, A. A., et al.	2005	Screening of mentally handicapped Egyptian children for fragile X syndrome using clinical, cytogenetic and molecular approaches.	Journal of Pediatric Neurology 3(4): 217-225.
Sewell, A. C., et al.	1996	The spectrum of free neuraminic acid storage disease in childhood: Clinical, morphological and biochemical observations in three non‐Finnish patients.	American Journal of Medical Genetics 63(1): 203-208.
Sfar, S., et al.	2012	A novel CASR mutation in a Tunisian FHH/NSHPT family associated with a mental retardation.	Molecular Biology Reports 39(3): 2395-2400.
Shamseldin, H. E., et al.	2016	Mutations in UNC80, encoding part of the UNC79-UNC80-NALCN channel complex, cause autosomal-recessive severe infantile encephalopathy.	The American Journal of Human Genetics 98(1): 210-215.
Sharaf-Eldin, W. E., et al.	2020	Mutation spectrum in the gene encoding methyl-CpG-binding protein 2 in Egyptian patients with Rett syndrome.	Meta Gene 24: 100620-100620.
Shawky, R. M. and Gamal, R.	2016	Christ-Siemens-Touraine syndrome with cleft palate, absent nipples, gallstones and mild mental retardation in an Egyptian child.	Egyptian Journal of Medical Human Genetics 17(4): 389-395.
Shawky, R. M. and Gamal, R.	2017	C syndrome with skeletal anomalies, mental retardation, eyelid chalazion, Bitot’s spots and agenesis of the corpus callosum in an Egyptian child.	Egyptian Journal of Medical Human Genetics 18(1): 93-97.
Shawky, R. M., et al.	2011	Screening for subtle chromosomal rearrangements in an Egyptian sample of children with unexplained mental retardation.	Egyptian Journal of Medical Human Genetics 12(1).
Shawky, R. M., et al.	2012	Neonatal progeroid syndrome (Wiedemann-Rautenstrauch syndrome) in an Egyptian child with premature loss of teeth, and cafe au lait skin patches.	Egyptian Journal of Medical Human Genetics 13(2): 227-231.
Shawky, R. M., et al.	2012	Profile of genetic disorders prevalent in northeast region of Cairo, Egypt.	Egyptian Journal of Medical Human Genetics 13(1): 45-62.
Shawky, R. M., et al.	2012	Case Report-Facial dysmorphism, skeletal anomalies, congenital glucoma, dysplastic nails: Mild Rubinstein-Taybi Syndrome.	Egyptian Journal of Medical Human Genetics 13(2): 233-237.
Shawky, R. M., et al.	2012	Multiple pterygium syndrome with marked pterygia of the fingers and MRI changes in the spine.	Egyptian Journal of Medical Human Genetics 13(1): 107-113.
Shawky, R. M., et al.	2013	Cornelia-de Lange syndrome in an Egyptian infant with unusual bone deformities.	Egyptian Journal of Medical Human Genetics 14(1): 109-112.
Shawky, R. M., et al.	2013	Familial Peters Plus syndrome with absent anal canal, sacral agenesis and sensorineural hearing loss: Expanding the clinical spectrum.	Egyptian Journal of Medical Human Genetics 14(4): 423-428.
Shawky, R. M., et al.	2013	Oral-facial-digital syndrome type II: Transitional type between Mohr and Varadi.	Egyptian Journal of Medical Human Genetics 14(3): 311-315.
Shawky, R. M., et al.	2014	Intrafamilial variability in Simpson–Golabi–Behmel syndrome with bilateral posterior ear lobule creases.	Egyptian Journal of Medical Human Genetics 15(1): 87-90.
Shawky, R. M., et al.	2014	Case Report: Oral–Facial–Digital Syndrome type VI with self mutilations.	Egyptian Journal of Medical Human Genetics 15(4): 399-403.
Shawky, R. M., et al.	2014	Bilateral iris, choroid, optic nerve colobomas and retinal detachment in an Egyptian patient with mild Baraitser–Winter syndrome.	Egyptian Journal of Medical Human Genetics 15(1): 95-97.
Shawky, R. M., et al.	2014	Non-deletion mutations in Egyptian patients with Duchenne muscular dystrophy.	Egyptian Journal of Medical Human Genetics 15(3): 235-240.
Shawky, R. M., et al.	2015	Trichorhinophalangeal syndrome II, expanding the clinical spectrum.	Egyptian Journal of Medical Human Genetics 16(1): 89094
Shawky, R. M., et al.	2015	Berardinelli–Seip syndrome type 2–An Egyptian child.	Egyptian Journal of Medical Human Genetics 16(2): 189-193.
Shawky, R. M., et al.	2017	Kabuki make-up syndrome with genitourinary anomalies, ophthalmologic features and hyperpigmentation in an Egyptian child.	Egyptian Journal of Medical Human Genetics 18(1): 87-92.
Shongo, M. Y., et al.	2012	Association esophageal atresia type 3-microcephaly: an incomplete Feingold syndrome?	The Pan African Medical Journal 13: 85-85.
Sinnette, C. and Odeku, E. L.	1968	Rubinstein-Taybi syndrome: the first case in an African child and the first case recognized at birth.	Clinical Pediatrics 7(8): 488-492.
Slimani, W., et al.	2019	Clinical and molecular findings in nine new cases of tetrasomy 18p syndrome: FISH and array CGH characterization.	Molecular Cytogenetics 12(1): 1-7.
Smaili, W., et al.	2020	Exome sequencing revealed a novel homozygous METTL23 gene mutation leading to familial mild intellectual disability with dysmorphic features.	European Journal of Medical Genetics 63(7): 103951-103951.
Solomon, G. A. E., et al.	2015	Biochemical and genetic diagnosis of Smith-Lemli-Opitz syndrome in South Africa.	South African Journal of Child Health 9(1): 23-26.
Stevanin, G., et al.	2008	Mutations in SPG11 are frequent in autosomal recessive spastic paraplegia with thin corpus callosum, cognitive decline and lower motor neuron degeneration.	Brain 131(3): 772-784.
Swanepoel, D.	2007	Auditory pathology in cri‐du‐chat (5p‐) syndrome: phenotypic evidence for auditory neuropathy.	Clinical Genetics 72(4): 369-373.
Tajir, M., et al.	2012	Pyruvate dehydrogenase deficiency caused by a new mutation of PDHX gene in two Moroccan patients.	European Journal of Medical Genetics 55(10): 535-540.
Tajir, M., et al.	2013	Germline mosaicism in Rubinstein–Taybi syndrome.	Gene 518(2): 476-478.
Takhar, J., et al.	2002	An interstitial deletion of the long arm of chromosome 21 in a case of a first episode of psychosis.	Acta Psychiatrica Scandinavica 106(1): 71-74.
Tayel, S., et al.	1989	A case of de novo trisomy 12p syndrome.	Clinical Genetics 35(5): 382-386.
Tekendo-Ngongang, C., et al.	2014	Challenges in clinical diagnosis of Williams-Beuren syndrome in sub-Saharan Africans: case reports from Cameroon.	Molecular Syndromology 5(6): 287-292.
Tekendo-Ngongang, C., et al.	2019	Noonan syndrome in South Africa: Clinical and molecular profiles.	Frontiers in genetics 10: 333-333.
Tekendo‐Ngongang, C., et al.	2020	MECP2 duplication syndrome in a patient from Cameroon.	American Journal of Medical Genetics Part A 182(4): 619-622.
Temtamy, S. A., et al.	1996	COFS syndrome with familial 1; 16 translocation.	Clinical Genetics 50(4): 240-243.
Temtamy, S. A., et al.	2007	Phenotypic and cytogenetic spectrum of 9p trisomy.	Genetic Counseling 18(1): 29-48.
Tinsa, F., et al.	2009	Monosomy 10q26-qter and trisomy 11q13-qter as a result ofde novo unbalanced translocation.	Journal of applied genetics 50(3): 289-291.
Tomatsu, S., et al.	2011	Mucopolysaccharidosis type IVA (Morquio A disease): clinical review and current treatment: a special review.	Current pharmaceutical biotechnology 12(6): 931-945.
Touati, A., et al.	2019	Additional Tunisian patients with Sanjad–Sakati syndrome: A review toward a consensus on diagnostic criteria.	Archives de Pédiatrie 26(2): 102-107.
Triki, C., et al.	2003	Merosin-deficient congenital muscular dystrophy with mental retardation and cerebellar cysts, unlinked to the LAMA2, FCMD, MEB and CMD1B loci, in three Tunisian patients.	Neuromuscular Disorders 13(1): 4-12.
Turkia, B., et al.	2011	Congenital hyperinsulinism: review of 12 Tunisian cases.	La Tunisie Medicale 89(4): 369-373.
Uwineza, A., et al.	2014	Array-CGH analysis in Rwandan patients presenting development delay/intellectual disability with multiple congenital anomalies.	BMC Medical Genetics 15(1): 1-10.
Uwineza, A., et al.	2016	Cytogenetic studies of rwandan pediatric patients presenting with global developmental delay, intellectual disability and/or multiple congenital anomalies.	Journal of Tropical Pediatrics 62(1): 38-45.
Uwineza, A., et al.	2019	VPS51 biallelic variants cause microcephaly with brain malformations: A confirmatory report.	European Journal of Medical Genetics 62(8): 103704-103704.
Van Hillegondsberg, L. S. and Michaelis, I. A.	2019	Alternating hemiplegia of childhood: First South African case report and verapamil as a possible treatment option.	SAMJ: South African Medical Journal 109(3): 152-153.
van Karnebeek, C. D. M., et al.	2019	Bi-allelic GOT2 mutations cause a treatable malate-aspartate shuttle-related encephalopathy.	The American Journal of Human Genetics 105(3): 534-548.
Venter J, P. A. and Op, T.H.	1982	Cytogenetic abnormalities including the marker X chromosome in patients with severe mental retardation.	South African Medical Journal 62(25): 947-950.
Venter, P. A., et al.	1986	The Martin‐Bell syndrome in South Africa.	American Journal of Medical Genetics 23(1‐2): 597-610.
Venter, P.A., Gericke, G.S., Dawson, B., and Op't Hof, J..	1981	A marker X chromosome associated with nonspecific male mental retardation-the first South African cases.	South African Medical Journal 60(21): 807-811.
Viljoen, D. L. and Smart, R.	1993	Split-foot anomaly, microphthalmia, cleft-lip and cleft-palate, and mental retardation associated with a chromosome 6; 13 translocation.	Clinical Dysmorphology 2(3): 274-277.
Viljoen, D. L., et al.	1992	Putative monosomy 21 in two patients: clinical findings and investigation using fluorescence in situ hybridization.	Clinical Genetics 42(3): 105-109.
Viuoen, D. and Beighton P.	1990	Marfan syndrome: a diagnostic dilemma.	Clinical Genetics 37(6): 417-422.
Vorster, A. A., et al.	2015	Spondyloepimetaphyseal dysplasia with joint laxity (Beighton type); mutation analysis in eight affected South African families.	Clinical Genetics 87(5): 492-495.
Winship, I. M.	1985	Sotos syndrome--autosomal dominant inheritance substantiated.	Clinical Genetics 28(3): 243-246.
Wonkam, A., et al.	2017	The 22q11. 2 deletion syndrome in congenital heart defects: prevalence of microdeletion syndrome in Cameroon.	Global Heart 12(2): 115-120.
Yahia, A., et al.	2018	Intra-familial phenotypic heterogeneity in a Sudanese family with DARS2-related leukoencephalopathy, brainstem and spinal cord involvement and lactate elevation: a case report.	BMC neurology 18(1): 1-6.
Yalaburgi, S. B.	1984	The Brachmann-de Lange syndrome-a case report.	South African Medical Journal 66(3): 112-113.
Zaki, M. S., et al.	2008	The molar tooth sign: a new Joubert syndrome and related cerebellar disorders classification system tested in Egyptian families.	Neurology 70(7): 556-565.
Zaki, M. S., et al.	2012	Molecular analysis of MECP2 gene in Egyptian patients with Rett syndrome.	Egyptian Journal of Medical Human Genetics 13(1): 19-27.
Zaki, M. S., et al.	2012	Bladder exstrophy and extreme genital anomaly in a patient with pure terminal 1q deletion: Expansion of phenotypic spectrum.	European Journal of Medical Genetics 55(1): 43-48.
Zaki, M. S., et al.	2012	Emanuel syndrome due to unusual segregation of paternal origin.	Genetic Counseling 23(2): 319-319.
Zaki, M. S., et al.	2019	Bilateral Calcification of Basal Ganglia in a Patient with Duplication of Both 11q13. 1q22. 1 and 4q35. 2 with New Phenotypic Features.	Cytogenetic and Genome Research 159(3): 130-136.
Zaki, M. S., et al.	2020	Blepharophimosis‐ptosis‐intellectual disability syndrome: A report of nine Egyptian patients with further expansion of phenotypic and mutational spectrum.	American Journal of Medical Genetics Part A 182(12): 2857-2866.
Zaki, O. K., et al.	2016	Novel mutation in an Egyptian patient with infantile Canavan disease.	Metabolic Brain Disease 31(3): 573-577.
Zaki, O. K., et al.	2017	Two patients with Canavan disease and structural modeling of a novel mutation.	Metabolic Brain Disease 32(1): 171-177.
Zayed, H., et al.	2019	Clinical, biochemical, neuroradiological and molecular characterization of Egyptian patients with glutaric acidemia type 1.	Metabolic Brain Disease 34(4): 1231-1241.
Zilmer, M., et al.	2020	Novel congenital disorder of O-linked glycosylation caused by GALNT2 loss of function.	Brain 143(4): 1114-1126.
Zrhidri, A., et al.	2017	Identification of two novel SH3PXD2B gene mutations in Frank-Ter Haar syndrome by exome sequencing: Case report and review of the literature.	Gene 628: 190-193.
